# Supplementary material for: Adolescent and Juvenile Idiopathic Scoliosis: Which Patients Obtain Good Results with 12 Hours of Cheneau–Toulouse–Munster Nighttime Bracing?
Source: MDPI journal article supplement (doi:10.3390/children9060909), 2022-06-17
Supplement: s1 [file s1]

# SUPPLEMENTAL FILE S1

| FRONTAL PLANE                      |                                                                                      |
|------------------------------------|--------------------------------------------------------------------------------------|
| Frontal C7 Tilt<br>(mm and degree) | 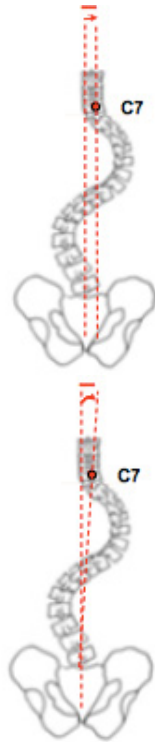  |
| Acromio-femoral Angle              |  |

|                                            |                                                                                      |
|--------------------------------------------|--------------------------------------------------------------------------------------|
| <p>Vertebrae Number</p>                    | 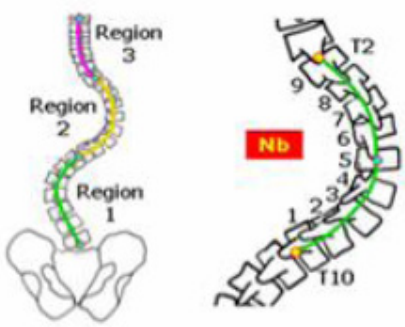   |
| <p>Lateral Displacement Apex Vertebrae</p> |   |
| <p>Iliolumbar Angle</p>                    |  |
| <p>Wedging</p>                             |  |

| SAGITTAL PLANE                        |  |
|---------------------------------------|--|
| Sagittal C7 Tilt degree               |  |
| Pelvic Incidence                      |  |
| Sacral Slope                          |  |
| Pelvic Tilt                           |  |
| Lumbar Lordosis and Thoracic Kyphosis |  |
